# Supplementary material
Source: Springer Nature journal article supplement (https://www.springermedizin.de/resource/supplementary/12978_2011_111_MOESM2_ESM.pdf/9602886)

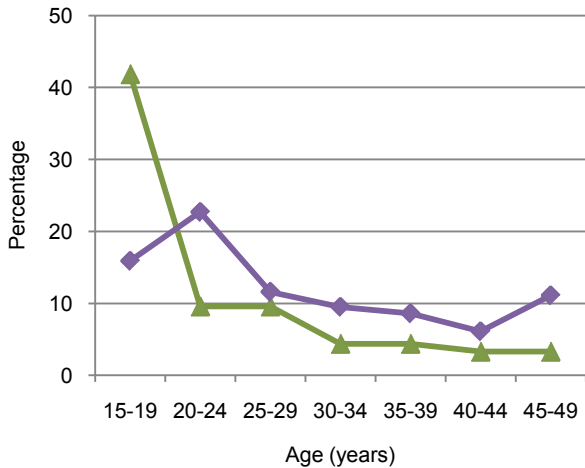

**A** — Indonesia — Timor-Leste

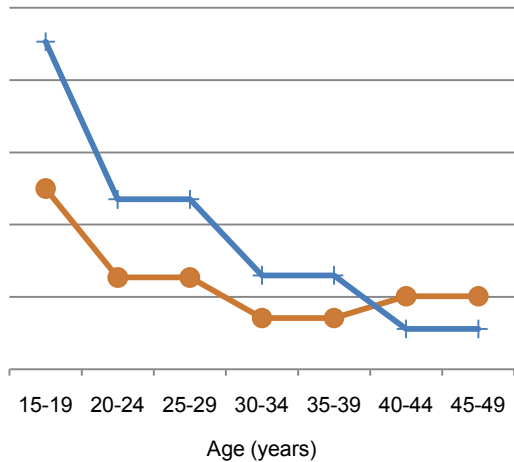

**B** — Papua New Guinea — Philippines

Supplement: MOESM2 [file 9602886]
